# Supplementary material for: Diethanolamine Modified Perovskite-Substrate Interface for Realizing Efficient ESL-Free PSCs
Source: MDPI journal article supplement (doi:10.3390/nano13020250), 2023-01-06
Supplement: s1 [file s1]

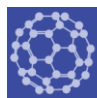

## Supplementary Materials

# Diethanolamine Modified Perovskite-Substrate Interface for Realizing Efficient ESL-Free PSCs

Sajid Sajid <sup>1,2</sup>, Salem Alzahmi <sup>1,2,\*</sup>, Dong Wei <sup>3</sup>, Imen Ben Salem <sup>4</sup>, Jongee Park <sup>5</sup> and Ihab M. Obaidat <sup>2,6,\*</sup>

<sup>1</sup> Department of Chemical & Petroleum Engineering, United Arab Emirates University, Al Ain P.O. Box 15551, United Arab Emirates

<sup>2</sup> National Water and Energy Center, United Arab Emirates University, Al Ain P.O. Box 15551, United Arab Emirates

<sup>3</sup> College of Physics and Energy, Fujian Normal University, Fuzhou 350007, China

<sup>4</sup> College of Natural and Health Sciences, Zayed University, Abu Dhabi P.O. Box 144534, United Arab Emirates

<sup>5</sup> Department of Metallurgical and Materials Engineering, Atılım University, Ankara 06836, Turkey

<sup>6</sup> Department of Physics, United Arab Emirates University, Al Ain P.O. Box 15551, United Arab Emirates

\* Correspondence: s.alzahmi@uaeu.ac.ae (S.A.); iobaidat@uaeu.ac.ae (I.M.O.)

## Supporting Information

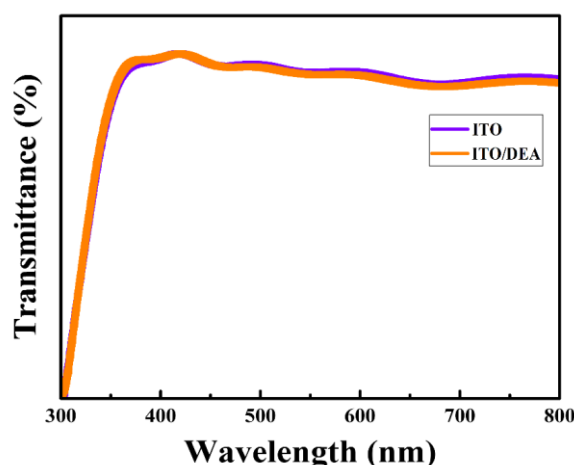

**Figure S1.** Transmittance spectra of bare ITO and DEA-treated ITO substrates.

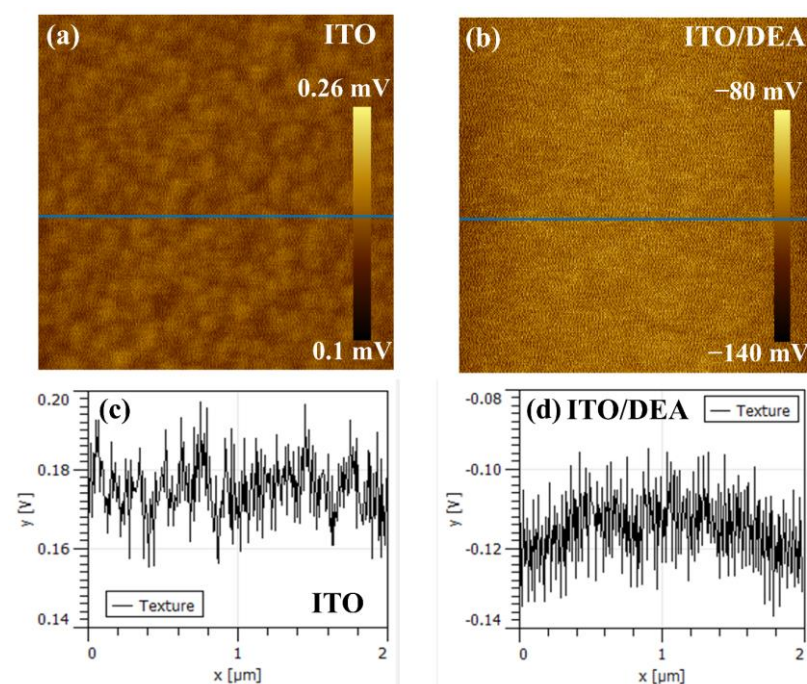

**Figure S2.** KPFM images (a,b) and corresponding potential difference curves (c,d) of the bare ITO and DEA-modified ITO substrates.

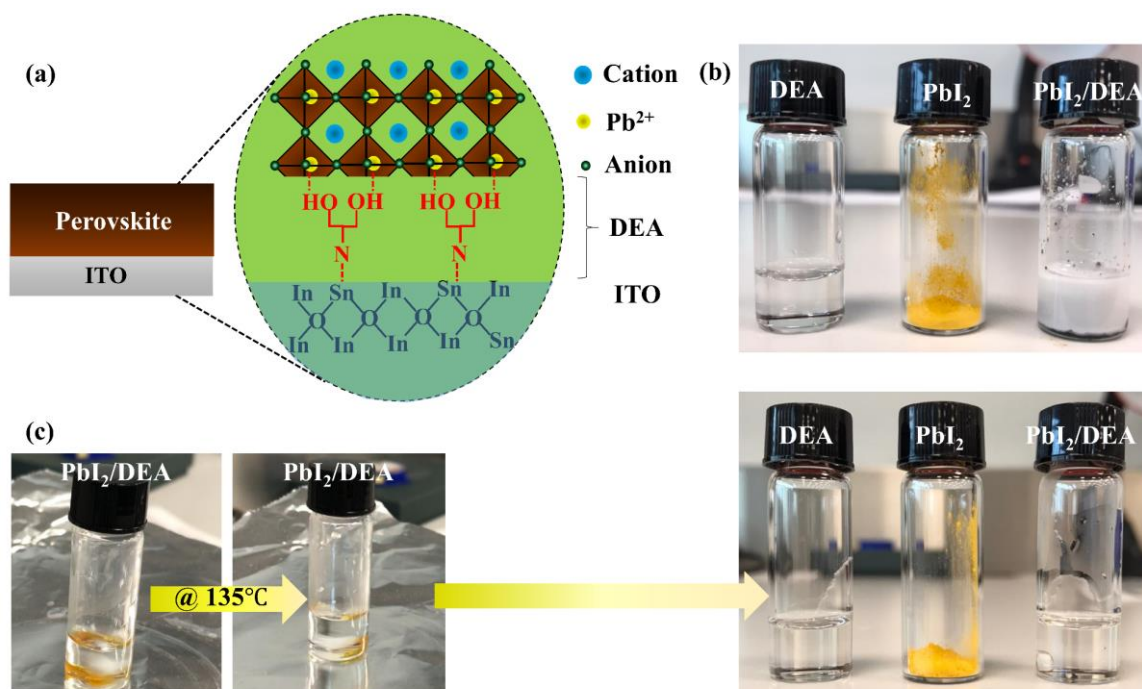

**Figure S3.** An strengthened link at the ITO/perovskite interface is highlighted by a coupling between the -OH group and Pb in the perovskite in this schematic example of surface modification of ITO-substrate with DEA (a), Photos of DEA liquid,  $\text{PbI}_2$  powder and  $\text{PbI}_2/\text{DEA}$  mixture (b), Photos of DEA liquid,  $\text{PbI}_2$  powder and  $\text{PbI}_2/\text{DEA}$  mixture under 135 °C (c).

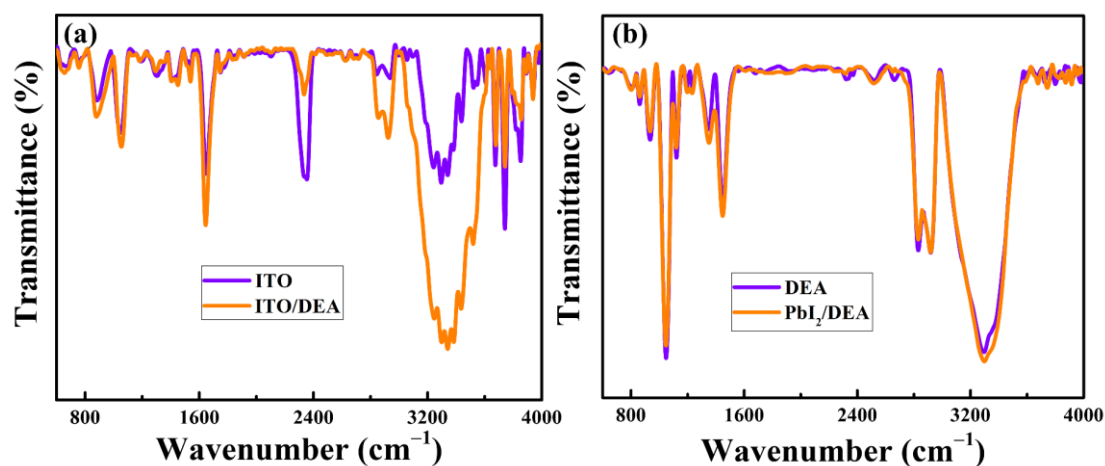

**Figure S4.** FT-IR spectroscopy of the ITO and ITO/DEA substrates (a), and DEA liquid and  $\text{PbI}_2/\text{DEA}$  mixture (b).

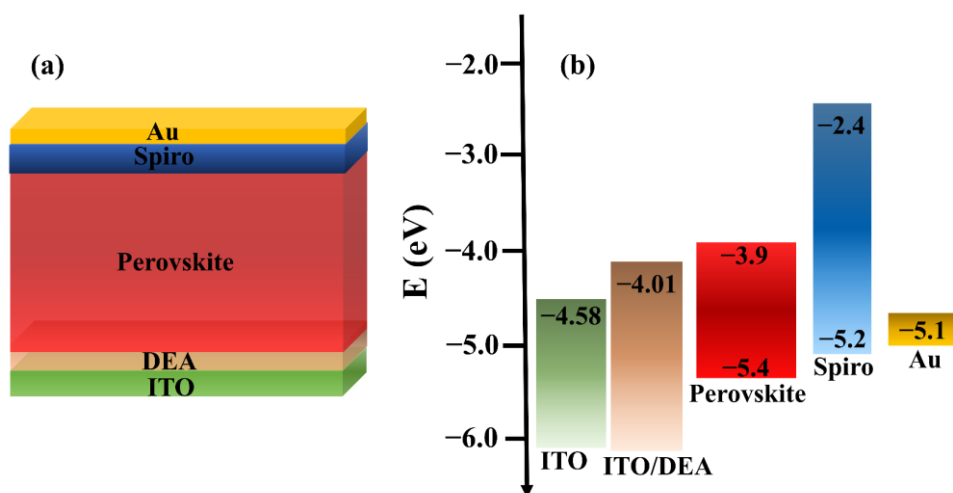

**Figure S5.** Schematic illustration of as-prepared PSC (a) and energy band diagrams of the corresponding layers (b).

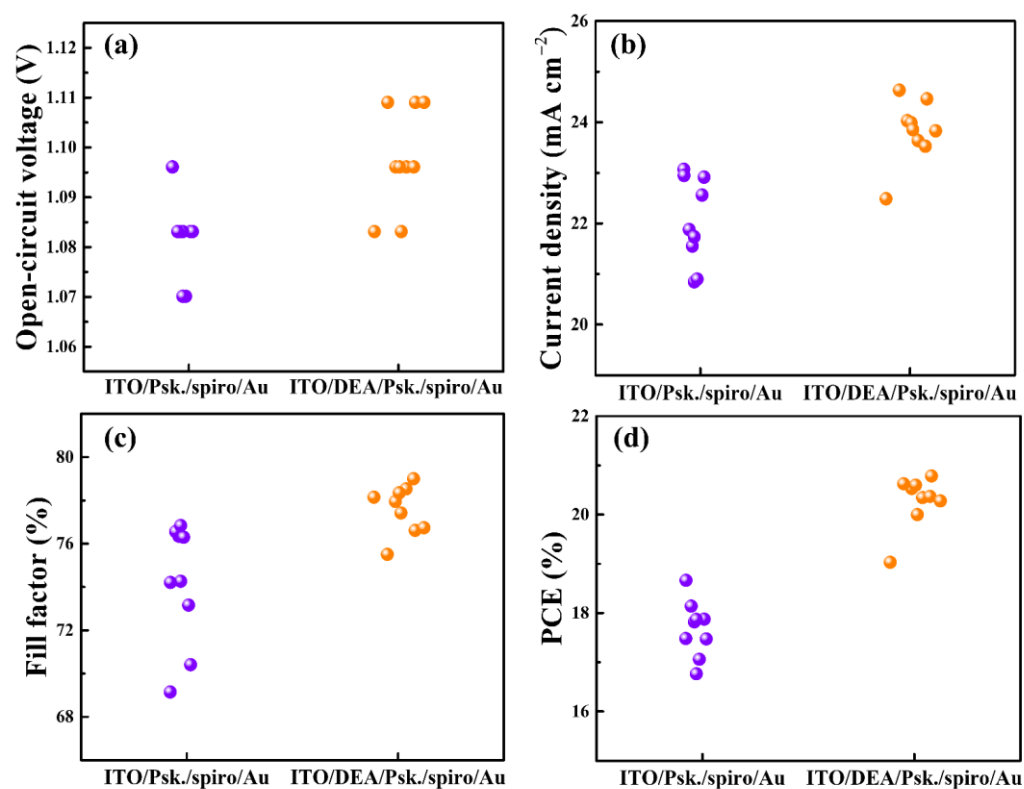

**Figure S6.** Statistical analyses of the ESLs-free PSCs prepared with bare ITO and DEA-modified ITO substrates,  $V_{oc}$  (a),  $J_{sc}$  (b), FF (c), and PCE (d).

**Table S1.** TRPL data for the perovskite layers prepared on bare ITO and DEA-modified substrates.

| Perovskite on | $\tau_1$ (ns)         | $\tau_2$ (ns)           |
|---------------|-----------------------|-------------------------|
| ITO           | $10.95783 \pm 0.195$  | $111.30219 \pm 1.58806$ |
| ITO/DEA       | $6.82892 \pm 0.11677$ | $48.19467 \pm 0.39644$  |
